# Supplementary material
Source: publisher figshare collection journal article supplement (https://acs.figshare.com/ndownloader/files/4276068)
Supplement: Supplementary file 1 [file 4276068]

  
data_8+SbF6- 
  
_audit_creation_method            SHELXL-97 
_chemical_name_systematic 
; 
 ? 
; 
_chemical_name_common             ? 
_chemical_melting_point           ? 
_chemical_formula_moiety          'C29 H33 O, F6 Sb, C H2 Cl2' 
_chemical_formula_sum 
 'C30 H35 Cl2 F6 O Sb' 
_chemical_formula_weight          718.23 
  
loop_ 
 _atom_type_symbol 
 _atom_type_description 
 _atom_type_scat_dispersion_real 
 _atom_type_scat_dispersion_imag 
 _atom_type_scat_source 
 'C'  'C'   0.0033   0.0016 
 'International Tables Vol C Tables 4.2.6.8 and 6.1.1.4' 
 'H'  'H'   0.0000   0.0000 
 'International Tables Vol C Tables 4.2.6.8 and 6.1.1.4' 
 'O'  'O'   0.0106   0.0060 
 'International Tables Vol C Tables 4.2.6.8 and 6.1.1.4' 
 'F'  'F'   0.0171   0.0103 
 'International Tables Vol C Tables 4.2.6.8 and 6.1.1.4' 
 'Cl'  'Cl'   0.1484   0.1585 
 'International Tables Vol C Tables 4.2.6.8 and 6.1.1.4' 
 'Sb'  'Sb'  -0.5866   1.5461 
 'International Tables Vol C Tables 4.2.6.8 and 6.1.1.4' 
  
_symmetry_cell_setting            Monoclinic 
_symmetry_space_group_name_H-M    P2(1)/c 
_symmetry_space_group_name_Hall   '-P 2ybc'
  
loop_ 
 _symmetry_equiv_pos_as_xyz 
 'x, y, z' 
 '-x, y+1/2, -z+1/2' 
 '-x, -y, -z' 
 'x, -y-1/2, z-1/2' 
  
_cell_length_a                    13.787(3) 
_cell_length_b                    15.652(4) 
_cell_length_c                    15.063(4) 
_cell_angle_alpha                 90.00 
_cell_angle_beta                  112.361(4) 
_cell_angle_gamma                 90.00 
_cell_volume                      3006.2(12) 
_cell_formula_units_Z             4 
_cell_measurement_temperature     100(2) 
_cell_measurement_reflns_used     ? 
_cell_measurement_theta_min       ? 
_cell_measurement_theta_max       ? 
  
_exptl_crystal_description        colorless 
_exptl_crystal_colour             prism
_exptl_crystal_size_max           0.30 
_exptl_crystal_size_mid           0.30 
_exptl_crystal_size_min           0.20 
_exptl_crystal_density_meas       ? 
_exptl_crystal_density_diffrn     1.587 
_exptl_crystal_density_method     'not measured' 
_exptl_crystal_F_000              1448 
_exptl_absorpt_coefficient_mu     1.156 
_exptl_absorpt_correction_type    empirical 
_exptl_absorpt_correction_T_min   0.7231 
_exptl_absorpt_correction_T_max   0.8018 
_exptl_absorpt_process_details    ? 
  
_exptl_special_details 
; 
 ? 
; 
  
_diffrn_ambient_temperature       100(2) 
_diffrn_radiation_wavelength      0.71073 
_diffrn_radiation_type            MoK\a 
_diffrn_radiation_source          'fine-focus sealed tube' 
_diffrn_radiation_monochromator   graphite 
_diffrn_measurement_device_type   'CCD area detector' 
_diffrn_measurement_method        'phi and omega scans' 
_diffrn_detector_area_resol_mean  ? 
_diffrn_standards_number          ? 
_diffrn_standards_interval_count  ? 
_diffrn_standards_interval_time   ? 
_diffrn_standards_decay_%         ? 
_diffrn_reflns_number             11076 
_diffrn_reflns_av_R_equivalents   0.0505 
_diffrn_reflns_av_sigmaI/netI     0.0642 
_diffrn_reflns_limit_h_min        -16 
_diffrn_reflns_limit_h_max        16 
_diffrn_reflns_limit_k_min        -15 
_diffrn_reflns_limit_k_max        18 
_diffrn_reflns_limit_l_min        -17 
_diffrn_reflns_limit_l_max        15 
_diffrn_reflns_theta_min          1.96 
_diffrn_reflns_theta_max          25.00 
_reflns_number_total              5173 
_reflns_number_gt                 3812 
_reflns_threshold_expression      >2sigma(I) 
  
_computing_data_collection        'Bruker SMART' 
_computing_cell_refinement        'Bruker SMART' 
_computing_data_reduction         'Bruker SHELXTL' 
_computing_structure_solution     'SHELXS-97 (Sheldrick, 1990)' 
_computing_structure_refinement   'SHELXL-97 (Sheldrick, 1997)' 
_computing_molecular_graphics     'Bruker SHELXTL' 
_computing_publication_material   'Bruker SHELXTL' 
  
_refine_special_details 
; 
 Refinement of F^2^ against ALL reflections.  The weighted R-factor wR and 
 goodness of fit S are based on F^2^, conventional R-factors R are based 
 on F, with F set to zero for negative F^2^. The threshold expression of 
 F^2^ > 2sigma(F^2^) is used only for calculating R-factors(gt) etc. and is 
 not relevant to the choice of reflections for refinement.  R-factors based 
 on F^2^ are statistically about twice as large as those based on F, and R- 
 factors based on ALL data will be even larger. 
; 
  
_refine_ls_structure_factor_coef  Fsqd 
_refine_ls_matrix_type            full 
_refine_ls_weighting_scheme       calc 
_refine_ls_weighting_details 
 'calc w=1/[\s^2^(Fo^2^)+(0.0586P)^2^+13.9364P] where P=(Fo^2^+2Fc^2^)/3' 
_atom_sites_solution_primary      direct 
_atom_sites_solution_secondary    difmap 
_atom_sites_solution_hydrogens    geom 
_refine_ls_hydrogen_treatment     mixed 
_refine_ls_extinction_method      none 
_refine_ls_extinction_coef        ? 
_refine_ls_number_reflns          5173 
_refine_ls_number_parameters      398 
_refine_ls_number_restraints      48 
_refine_ls_R_factor_all           0.0949 
_refine_ls_R_factor_gt            0.0664 
_refine_ls_wR_factor_ref          0.1628 
_refine_ls_wR_factor_gt           0.1492 
_refine_ls_goodness_of_fit_ref    1.125 
_refine_ls_restrained_S_all       1.121 
_refine_ls_shift/su_max           0.031 
_refine_ls_shift/su_mean          0.001 
  
loop_ 
 _atom_site_label 
 _atom_site_type_symbol 
 _atom_site_fract_x 
 _atom_site_fract_y 
 _atom_site_fract_z 
 _atom_site_U_iso_or_equiv 
 _atom_site_adp_type 
 _atom_site_occupancy 
 _atom_site_symmetry_multiplicity 
 _atom_site_calc_flag 
 _atom_site_refinement_flags 
 _atom_site_disorder_assembly 
 _atom_site_disorder_group 
Sb1 Sb 0.17632(4) 0.44011(3) 0.28730(4) 0.03585(18) Uani 1 1 d U . . 
F3 F 0.1098(9) 0.3719(8) 0.1811(8) 0.130(5) Uani 0.805(12) 1 d P A 1 
F4 F 0.1772(7) 0.5292(5) 0.2053(7) 0.090(4) Uani 0.805(12) 1 d P A 1 
F5 F 0.2500(7) 0.5096(5) 0.3968(6) 0.095(3) Uani 0.805(12) 1 d P A 1 
F6 F 0.1800(7) 0.3531(6) 0.3752(7) 0.085(3) Uani 0.805(12) 1 d P A 1 
F13 F 0.089(4) 0.336(3) 0.237(4) 0.114(16) Uani 0.195(12) 1 d PU A 2 
F14 F 0.108(2) 0.4766(19) 0.1496(19) 0.053(8) Uani 0.195(12) 1 d PU A 2 
F15 F 0.214(3) 0.548(3) 0.316(3) 0.104(14) Uani 0.195(12) 1 d PU A 2 
F16 F 0.214(3) 0.407(3) 0.407(3) 0.090(13) Uani 0.195(12) 1 d PU A 2 
Cl2 Cl 0.50329(17) 0.35873(16) 0.46814(17) 0.0527(6) Uani 1 1 d . . . 
Cl1 Cl 0.61066(16) 0.21334(17) 0.59425(17) 0.0553(6) Uani 1 1 d . . . 
O1 O 0.1512(4) 0.3232(3) 0.5732(3) 0.0308(11) Uani 1 1 d . . . 
F2 F 0.3058(5) 0.4029(5) 0.2866(5) 0.085(2) Uani 1 1 d . A . 
C6 C 0.3363(5) 0.3223(5) 0.6405(5) 0.0283(15) Uani 1 1 d . . . 
F1 F 0.0468(4) 0.4784(5) 0.2888(5) 0.100(3) Uani 1 1 d . A . 
C1 C 0.2372(5) 0.2796(5) 0.5734(5) 0.0296(16) Uani 1 1 d . . . 
C4 C 0.0364(6) 0.2360(5) 0.4485(5) 0.0328(17) Uani 1 1 d . . . 
C12 C 0.3264(5) 0.1637(5) 0.5169(5) 0.0314(16) Uani 1 1 d . . . 
H12 H 0.3875 0.1976 0.5603 0.038 Uiso 1 1 calc R . . 
C18 C 0.1067(6) 0.1018(5) 0.3951(5) 0.0353(17) Uani 1 1 d . . . 
H18 H 0.0293 0.0928 0.3627 0.042 Uiso 1 1 calc R . . 
C3 C 0.1217(6) 0.1836(5) 0.4542(5) 0.0338(17) Uani 1 1 d . . . 
C2 C 0.2272(5) 0.2090(5) 0.5168(5) 0.0313(17) Uani 1 1 d . . . 
C23 C -0.1941(6) 0.2618(5) 0.4690(6) 0.042(2) Uani 1 1 d . . . 
H23 H -0.2470 0.2359 0.4915 0.050 Uiso 1 1 calc R . . 
C7 C 0.3550(6) 0.4080(5) 0.6254(5) 0.0332(17) Uani 1 1 d . . . 
H7 H 0.3064 0.4385 0.5727 0.040 Uiso 1 1 calc R . . 
C5 C 0.0536(5) 0.3030(5) 0.5124(5) 0.0327(17) Uani 1 1 d . . . 
C10 C 0.4974(5) 0.3185(5) 0.7833(5) 0.0362(18) Uani 1 1 d . . . 
H10 H 0.5453 0.2886 0.8369 0.043 Uiso 1 1 calc R . . 
C27 C -0.0285(5) 0.3583(5) 0.5300(5) 0.0321(17) Uani 1 1 d . . . 
H27 H 0.0097 0.3951 0.5869 0.039 Uiso 1 1 calc R . . 
C17 C 0.1518(6) 0.0210(5) 0.4597(5) 0.0365(18) Uani 1 1 d . . . 
H17A H 0.1377 0.0270 0.5191 0.044 Uiso 1 1 calc R . . 
H17B H 0.1131 -0.0300 0.4251 0.044 Uiso 1 1 calc R . . 
C16 C 0.2706(6) 0.0049(5) 0.4882(5) 0.0370(18) Uani 1 1 d . . . 
H16 H 0.2876 -0.0526 0.5191 0.044 Uiso 1 1 calc R . . 
C11 C 0.4068(6) 0.2776(5) 0.7195(5) 0.0346(17) Uani 1 1 d . . . 
H11 H 0.3934 0.2197 0.7299 0.042 Uiso 1 1 calc R . . 
C9 C 0.5160(6) 0.4033(5) 0.7668(6) 0.0405(19) Uani 1 1 d . . . 
H9 H 0.5774 0.4309 0.8094 0.049 Uiso 1 1 calc R . . 
C20 C 0.1507(6) 0.1079(5) 0.3136(6) 0.0415(19) Uani 1 1 d . . . 
H20A H 0.1140 0.0653 0.2635 0.050 Uiso 1 1 calc R . . 
H20B H 0.1342 0.1652 0.2839 0.050 Uiso 1 1 calc R . . 
C22 C -0.1526(6) 0.1896(5) 0.4206(7) 0.044(2) Uani 1 1 d . . . 
H22A H -0.1160 0.1460 0.4694 0.053 Uiso 1 1 calc R . . 
H22B H -0.2132 0.1615 0.3704 0.053 Uiso 1 1 calc R . . 
C14 C 0.2691(6) 0.0930(5) 0.3469(5) 0.0403(19) Uani 1 1 d . . . 
H14 H 0.2882 0.0922 0.2891 0.048 Uiso 1 1 calc R . . 
C26 C -0.0850(6) 0.4192(5) 0.4441(5) 0.0366(18) Uani 1 1 d . . . 
H26A H -0.0324 0.4450 0.4222 0.044 Uiso 1 1 calc R . . 
H26B H -0.1191 0.4659 0.4658 0.044 Uiso 1 1 calc R . . 
C19 C 0.3398(6) 0.0717(5) 0.5596(5) 0.0366(18) Uani 1 1 d . . . 
H19A H 0.4142 0.0546 0.5800 0.044 Uiso 1 1 calc R . . 
H19B H 0.3219 0.0723 0.6174 0.044 Uiso 1 1 calc R . . 
C15 C 0.2972(6) 0.0042(5) 0.3978(5) 0.0392(19) Uani 1 1 d . . . 
H15A H 0.2570 -0.0414 0.3536 0.047 Uiso 1 1 calc R . . 
H15B H 0.3729 -0.0076 0.4159 0.047 Uiso 1 1 calc R . . 
C21 C -0.0769(5) 0.2229(5) 0.3745(6) 0.0370(18) Uani 1 1 d . . . 
H21 H -0.0730 0.1773 0.3296 0.044 Uiso 1 1 calc R . . 
C8 C 0.4458(6) 0.4489(5) 0.6885(6) 0.0401(19) Uani 1 1 d . . . 
H8 H 0.4596 0.5067 0.6781 0.048 Uiso 1 1 calc R . . 
C13 C 0.3346(6) 0.1632(5) 0.4163(5) 0.0392(19) Uani 1 1 d . . . 
H13A H 0.3117 0.2196 0.3857 0.047 Uiso 1 1 calc R . . 
H13B H 0.4091 0.1557 0.4255 0.047 Uiso 1 1 calc R . . 
C25 C -0.1703(6) 0.3712(5) 0.3574(6) 0.0402(19) Uani 1 1 d . . . 
H25 H -0.2078 0.4144 0.3071 0.048 Uiso 1 1 calc R . . 
C29 C -0.1085(6) 0.3038(5) 0.5559(6) 0.0397(19) Uani 1 1 d . . . 
H29A H -0.0698 0.2585 0.6015 0.048 Uiso 1 1 calc R . . 
H29B H -0.1425 0.3409 0.5889 0.048 Uiso 1 1 calc R . . 
C24 C -0.2501(6) 0.3307(5) 0.3933(6) 0.042(2) Uani 1 1 d . . . 
H24A H -0.3081 0.3044 0.3390 0.051 Uiso 1 1 calc R . . 
H24B H -0.2801 0.3750 0.4222 0.051 Uiso 1 1 calc R . . 
C30 C 0.6031(7) 0.3249(7) 0.5796(7) 0.065(3) Uani 1 1 d . . . 
H30A H 0.6719 0.3465 0.5829 0.078 Uiso 1 1 calc R . . 
H30B H 0.5889 0.3507 0.6334 0.078 Uiso 1 1 calc R . . 
C28 C -0.1224(6) 0.3037(6) 0.3119(5) 0.041(2) Uani 1 1 d . . . 
H28A H -0.0656 0.3309 0.2969 0.049 Uiso 1 1 calc R . . 
H28B H -0.1771 0.2851 0.2503 0.049 Uiso 1 1 calc R . . 
  
loop_ 
 _atom_site_aniso_label 
 _atom_site_aniso_U_11 
 _atom_site_aniso_U_22 
 _atom_site_aniso_U_33 
 _atom_site_aniso_U_23 
 _atom_site_aniso_U_13 
 _atom_site_aniso_U_12 
Sb1 0.0374(3) 0.0383(3) 0.0358(3) 0.0075(3) 0.0183(2) 0.0066(3) 
F3 0.143(9) 0.135(10) 0.077(7) -0.056(7) 0.002(7) -0.055(8) 
F4 0.115(7) 0.072(6) 0.105(8) 0.063(6) 0.068(6) 0.040(5) 
F5 0.112(7) 0.075(6) 0.076(6) -0.037(5) 0.012(5) -0.005(5) 
F6 0.083(6) 0.083(6) 0.094(7) 0.062(5) 0.039(5) 0.011(5) 
F13 0.112(18) 0.116(18) 0.112(18) -0.007(10) 0.040(11) -0.006(10) 
F14 0.058(11) 0.063(12) 0.042(11) 0.009(8) 0.022(8) 0.004(8) 
F15 0.101(16) 0.110(17) 0.102(17) -0.011(10) 0.039(10) -0.003(9) 
F16 0.089(15) 0.101(16) 0.086(15) 0.004(9) 0.039(10) -0.003(9) 
Cl2 0.0433(11) 0.0643(14) 0.0522(13) 0.0003(11) 0.0200(10) 0.0003(10) 
Cl1 0.0322(10) 0.0818(17) 0.0500(13) 0.0074(12) 0.0135(10) 0.0071(11) 
O1 0.028(3) 0.033(3) 0.031(3) 0.000(2) 0.010(2) 0.000(2) 
F2 0.071(4) 0.118(5) 0.089(4) 0.043(4) 0.056(4) 0.053(4) 
C6 0.027(3) 0.034(4) 0.024(4) -0.001(3) 0.009(3) 0.001(3) 
F1 0.058(4) 0.165(7) 0.095(5) 0.068(5) 0.047(3) 0.056(4) 
C1 0.027(4) 0.038(4) 0.025(4) 0.002(3) 0.011(3) 0.000(3) 
C4 0.031(4) 0.044(5) 0.026(4) -0.001(3) 0.014(3) -0.011(3) 
C12 0.025(4) 0.038(4) 0.030(4) -0.001(3) 0.008(3) -0.005(3) 
C18 0.034(4) 0.040(4) 0.026(4) -0.001(3) 0.004(3) -0.007(4) 
C3 0.030(4) 0.042(4) 0.032(4) 0.001(3) 0.013(3) -0.006(3) 
C2 0.033(4) 0.030(4) 0.029(4) 0.004(3) 0.010(3) -0.006(3) 
C23 0.029(4) 0.050(5) 0.052(5) 0.001(4) 0.021(4) -0.003(4) 
C7 0.032(4) 0.044(4) 0.023(4) -0.004(3) 0.009(3) -0.002(3) 
C5 0.024(4) 0.044(5) 0.027(4) 0.005(3) 0.006(3) -0.005(3) 
C10 0.026(4) 0.057(5) 0.026(4) -0.006(4) 0.010(3) 0.008(4) 
C27 0.023(4) 0.041(4) 0.029(4) -0.006(3) 0.005(3) -0.001(3) 
C17 0.047(5) 0.037(4) 0.029(4) -0.008(3) 0.018(4) -0.012(4) 
C16 0.046(5) 0.035(4) 0.028(4) 0.001(3) 0.012(4) -0.004(4) 
C11 0.034(4) 0.042(4) 0.032(4) 0.002(3) 0.018(4) 0.000(3) 
C9 0.028(4) 0.047(5) 0.045(5) -0.016(4) 0.013(4) -0.007(4) 
C20 0.055(5) 0.028(4) 0.035(4) -0.007(3) 0.010(4) -0.008(4) 
C22 0.038(4) 0.042(5) 0.059(6) 0.001(4) 0.025(4) -0.010(4) 
C14 0.055(5) 0.047(5) 0.024(4) -0.006(4) 0.020(4) -0.011(4) 
C26 0.029(4) 0.042(5) 0.037(4) 0.002(3) 0.012(3) -0.003(3) 
C19 0.032(4) 0.047(5) 0.030(4) -0.005(4) 0.011(3) 0.002(3) 
C15 0.041(4) 0.040(5) 0.033(4) -0.008(4) 0.009(4) -0.004(4) 
C21 0.025(4) 0.046(5) 0.037(4) -0.006(4) 0.008(3) -0.008(3) 
C8 0.035(4) 0.039(5) 0.047(5) -0.004(4) 0.016(4) -0.006(4) 
C13 0.039(4) 0.049(5) 0.037(4) -0.001(4) 0.023(4) -0.005(4) 
C25 0.032(4) 0.044(5) 0.043(5) 0.008(4) 0.011(4) 0.001(4) 
C29 0.039(4) 0.050(5) 0.035(4) 0.004(4) 0.019(4) 0.006(4) 
C24 0.022(4) 0.051(5) 0.052(5) -0.006(4) 0.012(4) -0.002(4) 
C30 0.035(5) 0.107(9) 0.051(6) -0.025(6) 0.013(4) -0.008(5) 
C28 0.025(4) 0.064(6) 0.028(4) -0.003(4) 0.003(3) -0.011(4) 
  
_geom_special_details 
; 
 All esds (except the esd in the dihedral angle between two l.s. planes) 
 are estimated using the full covariance matrix.  The cell esds are taken 
 into account individually in the estimation of esds in distances, angles 
 and torsion angles; correlations between esds in cell parameters are only 
 used when they are defined by crystal symmetry.  An approximate (isotropic) 
 treatment of cell esds is used for estimating esds involving l.s. planes. 
; 
  
loop_ 
 _geom_bond_atom_site_label_1 
 _geom_bond_atom_site_label_2 
 _geom_bond_distance 
 _geom_bond_site_symmetry_2 
 _geom_bond_publ_flag 
Sb1 F15 1.78(4) . ? 
Sb1 F16 1.76(4) . ? 
Sb1 F3 1.850(8) . ? 
Sb1 F4 1.865(7) . ? 
Sb1 F2 1.881(5) . ? 
Sb1 F6 1.886(7) . ? 
Sb1 F1 1.892(5) . ? 
Sb1 F5 1.913(7) . ? 
Sb1 F13 2.00(5) . ? 
Sb1 F14 2.01(3) . ? 
Cl2 C30 1.799(10) . ? 
Cl1 C30 1.758(12) . ? 
O1 C5 1.347(8) . ? 
O1 C1 1.368(8) . ? 
C6 C7 1.401(10) . ? 
C6 C11 1.403(10) . ? 
C6 C1 1.511(10) . ? 
C1 C2 1.370(10) . ? 
C4 C5 1.382(11) . ? 
C4 C3 1.409(11) . ? 
C4 C21 1.548(10) . ? 
C12 C2 1.539(10) . ? 
C12 C19 1.559(11) . ? 
C12 C13 1.563(10) . ? 
C18 C3 1.528(11) . ? 
C18 C20 1.565(11) . ? 
C18 C17 1.573(11) . ? 
C3 C2 1.456(10) . ? 
C23 C29 1.538(11) . ? 
C23 C24 1.545(11) . ? 
C23 C22 1.567(11) . ? 
C7 C8 1.404(10) . ? 
C5 C27 1.525(10) . ? 
C10 C9 1.392(12) . ? 
C10 C11 1.407(10) . ? 
C27 C29 1.556(11) . ? 
C27 C26 1.557(10) . ? 
C17 C16 1.547(11) . ? 
C16 C15 1.539(11) . ? 
C16 C19 1.543(10) . ? 
C9 C8 1.402(11) . ? 
C20 C14 1.532(11) . ? 
C22 C21 1.548(11) . ? 
C14 C13 1.548(11) . ? 
C14 C15 1.564(11) . ? 
C26 C25 1.577(11) . ? 
C21 C28 1.559(11) . ? 
C25 C24 1.537(11) . ? 
C25 C28 1.539(11) . ? 
  
loop_ 
 _geom_angle_atom_site_label_1 
 _geom_angle_atom_site_label_2 
 _geom_angle_atom_site_label_3 
 _geom_angle 
 _geom_angle_site_symmetry_1 
 _geom_angle_site_symmetry_3 
 _geom_angle_publ_flag 
F15 Sb1 F16 95(2) . . ? 
F15 Sb1 F3 139.7(16) . . ? 
F16 Sb1 F3 124.9(16) . . ? 
F15 Sb1 F4 51.1(15) . . ? 
F16 Sb1 F4 146.0(16) . . ? 
F3 Sb1 F4 89.2(5) . . ? 
F15 Sb1 F2 95.9(13) . . ? 
F16 Sb1 F2 90.4(13) . . ? 
F3 Sb1 F2 88.6(5) . . ? 
F4 Sb1 F2 89.0(3) . . ? 
F15 Sb1 F6 126.3(16) . . ? 
F16 Sb1 F6 31.3(14) . . ? 
F3 Sb1 F6 93.6(6) . . ? 
F4 Sb1 F6 177.2(5) . . ? 
F2 Sb1 F6 90.5(3) . . ? 
F15 Sb1 F1 83.6(13) . . ? 
F16 Sb1 F1 89.4(13) . . ? 
F3 Sb1 F1 91.9(5) . . ? 
F4 Sb1 F1 90.9(3) . . ? 
F2 Sb1 F1 179.5(4) . . ? 
F6 Sb1 F1 89.6(3) . . ? 
F15 Sb1 F5 40.4(15) . . ? 
F16 Sb1 F5 55.4(16) . . ? 
F3 Sb1 F5 177.8(5) . . ? 
F4 Sb1 F5 90.6(5) . . ? 
F2 Sb1 F5 89.2(4) . . ? 
F6 Sb1 F5 86.6(5) . . ? 
F1 Sb1 F5 90.2(4) . . ? 
F15 Sb1 F13 161.6(19) . . ? 
F16 Sb1 F13 93(2) . . ? 
F3 Sb1 F13 33.9(14) . . ? 
F4 Sb1 F13 120.7(16) . . ? 
F2 Sb1 F13 100.6(14) . . ? 
F6 Sb1 F13 62.1(16) . . ? 
F1 Sb1 F13 79.9(14) . . ? 
F5 Sb1 F13 147.0(16) . . ? 
F15 Sb1 F14 87.6(17) . . ? 
F16 Sb1 F14 170.0(15) . . ? 
F3 Sb1 F14 52.3(10) . . ? 
F4 Sb1 F14 38.9(8) . . ? 
F2 Sb1 F14 98.9(8) . . ? 
F6 Sb1 F14 143.9(9) . . ? 
F1 Sb1 F14 81.4(8) . . ? 
F5 Sb1 F14 128.0(10) . . ? 
F13 Sb1 F14 81.9(17) . . ? 
C5 O1 C1 121.7(6) . . ? 
C7 C6 C11 120.2(7) . . ? 
C7 C6 C1 119.4(6) . . ? 
C11 C6 C1 120.3(7) . . ? 
O1 C1 C2 121.3(6) . . ? 
O1 C1 C6 110.0(6) . . ? 
C2 C1 C6 128.6(6) . . ? 
C5 C4 C3 118.7(7) . . ? 
C5 C4 C21 117.4(7) . . ? 
C3 C4 C21 123.9(7) . . ? 
C2 C12 C19 113.1(6) . . ? 
C2 C12 C13 113.1(6) . . ? 
C19 C12 C13 110.8(6) . . ? 
C3 C18 C20 113.5(6) . . ? 
C3 C18 C17 112.3(6) . . ? 
C20 C18 C17 110.8(6) . . ? 
C4 C3 C2 119.1(7) . . ? 
C4 C3 C18 121.8(6) . . ? 
C2 C3 C18 119.1(6) . . ? 
C1 C2 C3 117.5(7) . . ? 
C1 C2 C12 119.5(6) . . ? 
C3 C2 C12 122.9(7) . . ? 
C29 C23 C24 109.6(7) . . ? 
C29 C23 C22 114.0(6) . . ? 
C24 C23 C22 109.2(7) . . ? 
C6 C7 C8 119.9(7) . . ? 
O1 C5 C4 120.9(7) . . ? 
O1 C5 C27 111.3(6) . . ? 
C4 C5 C27 127.6(6) . . ? 
C9 C10 C11 119.2(7) . . ? 
C5 C27 C29 112.1(6) . . ? 
C5 C27 C26 111.9(6) . . ? 
C29 C27 C26 111.4(6) . . ? 
C16 C17 C18 115.4(6) . . ? 
C15 C16 C19 109.3(6) . . ? 
C15 C16 C17 109.9(6) . . ? 
C19 C16 C17 113.1(6) . . ? 
C6 C11 C10 120.1(7) . . ? 
C10 C9 C8 121.3(7) . . ? 
C14 C20 C18 114.6(6) . . ? 
C21 C22 C23 113.2(7) . . ? 
C20 C14 C13 112.8(7) . . ? 
C20 C14 C15 109.3(6) . . ? 
C13 C14 C15 109.1(6) . . ? 
C27 C26 C25 112.2(6) . . ? 
C16 C19 C12 113.1(6) . . ? 
C16 C15 C14 109.2(6) . . ? 
C22 C21 C4 112.9(6) . . ? 
C22 C21 C28 111.1(6) . . ? 
C4 C21 C28 113.1(6) . . ? 
C9 C8 C7 119.3(8) . . ? 
C14 C13 C12 114.8(6) . . ? 
C24 C25 C28 111.1(7) . . ? 
C24 C25 C26 108.2(7) . . ? 
C28 C25 C26 112.7(6) . . ? 
C23 C29 C27 114.2(6) . . ? 
C25 C24 C23 108.9(6) . . ? 
Cl1 C30 Cl2 113.4(5) . . ? 
C25 C28 C21 115.4(7) . . ? 
  
_diffrn_measured_fraction_theta_max    0.977 
_diffrn_reflns_theta_full              25.00 
_diffrn_measured_fraction_theta_full   0.977 
_refine_diff_density_max    1.526 
_refine_diff_density_min   -1.081 
_refine_diff_density_rms    0.125 
  
